## Publisher's Note

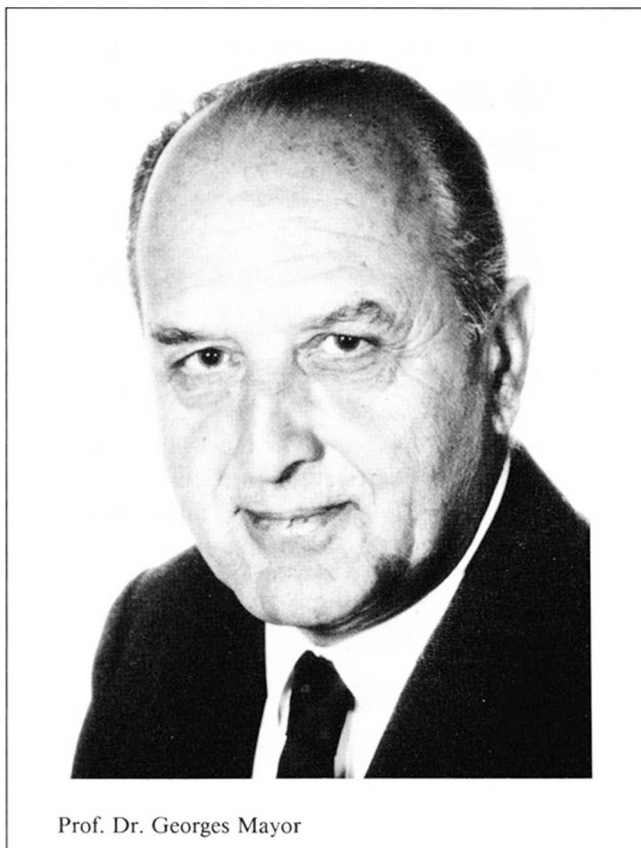

Prof. Dr. Georges Mayor

This issue of *Urologia Internationalis* marks the third change of editor in the history of the journal. The journal was founded in 1955 by Prof. P. Narath and taken over by Prof. G. Mayor in 1968. I would like to take this opportunity to thank Prof. Mayor for developing the journal into such a well-established, worldwide organ.

We have not just enjoyed the collaboration with Prof. Mayor on a scientific level, but, as with Prof. Narath, a close and friendly relationship has developed over the years. I would like to express my sincere gratitude to Prof. Mayor for the splendid teamwork. I should also like to thank the editorial secretary, Ms. B. Läubli, for all her work.

I wish Prof. Mayor every happiness in the future and hope that he will enjoy the time now available for his hobbies and family. Needless to say, I assume that he will continue to assist and support his specialized field and *Urologia Internationalis* whenever necessary.

I sincerely hope that the third editorial generation of the journal will endeavor to keep up with the rapidly changing trends in this specialized field of medicine. I am now very honored to welcome Prof. D. Hauri, a previous scholar of Prof. Mayor, to continue the tradition of this journal.

Thomas Karger
